# Supplementary material for: Cia Zeaxanthin Biosynthesis, OsZEP and OsVDE Regulate Striped Leaves Occurring in Response to Deep Transplanting of Rice
Source: MDPI journal article supplement (doi:10.3390/ijms23158340), 2022-07-28
Supplement: s1 [file s1]

A

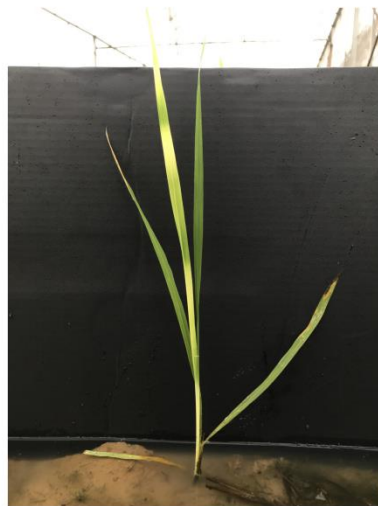

Deep Transplanting

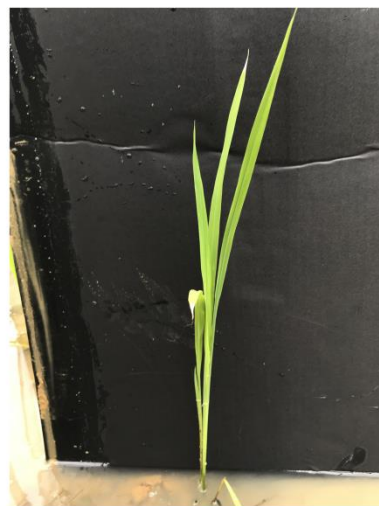

Shallow Transplanting

B

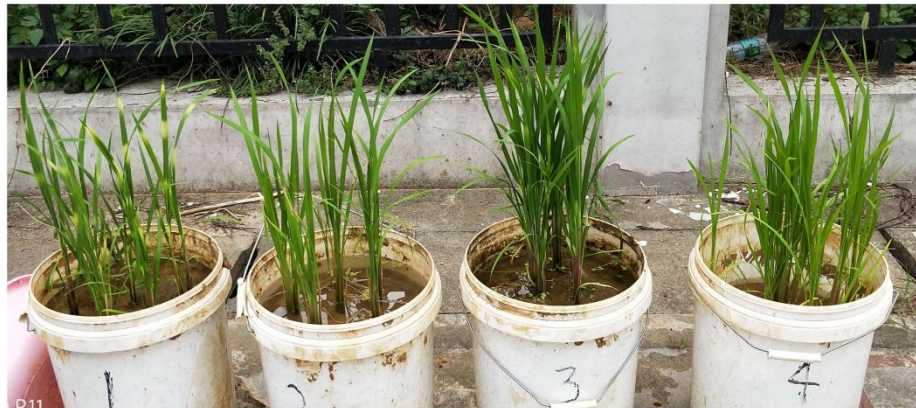

Deep Transplanting      Shallow Transplanting      Soil Covering      Non-transplanting

**Supplementary Figure S1.** Zebra-stripes leaves occurred to varying degrees in B03S under different treatments. **A.** Deep/shallow transplanting in the field. **B.** Deep/shallow transplanting, soil covering and CK plants in pots.

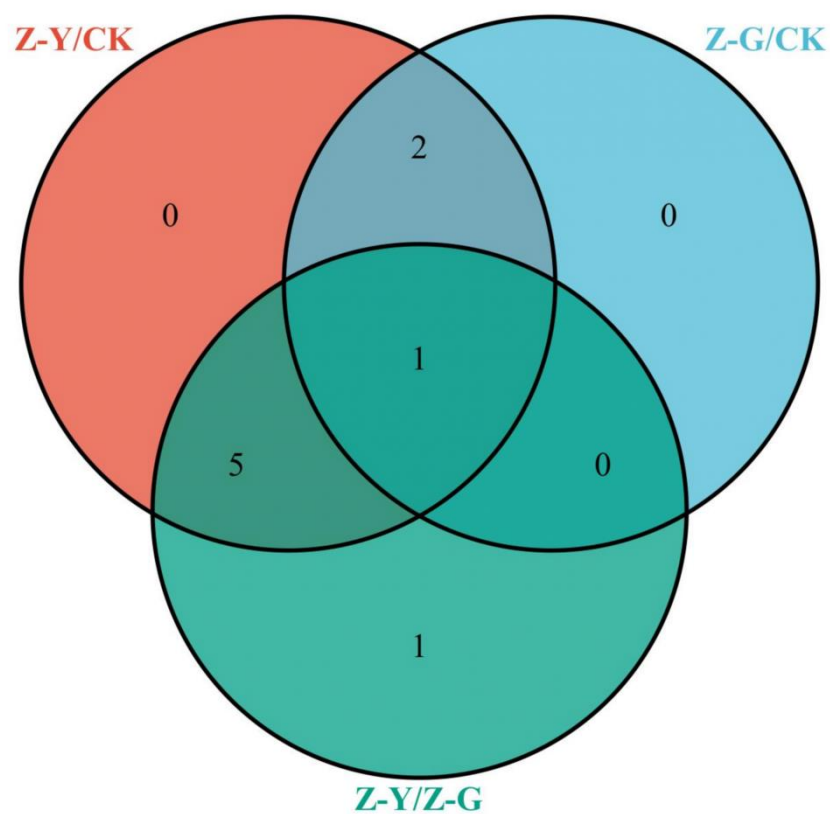

**Supplementary Figure S2.** Wayne diagram analysis of the differentially accumulated metabolites in the leaves of B03S. CK, full green leaves; Z-G, zebra-green striped in leaves/alternate green leaves; Z-Y, zebra-yellow striped in leaves/alternate yellow leaves.

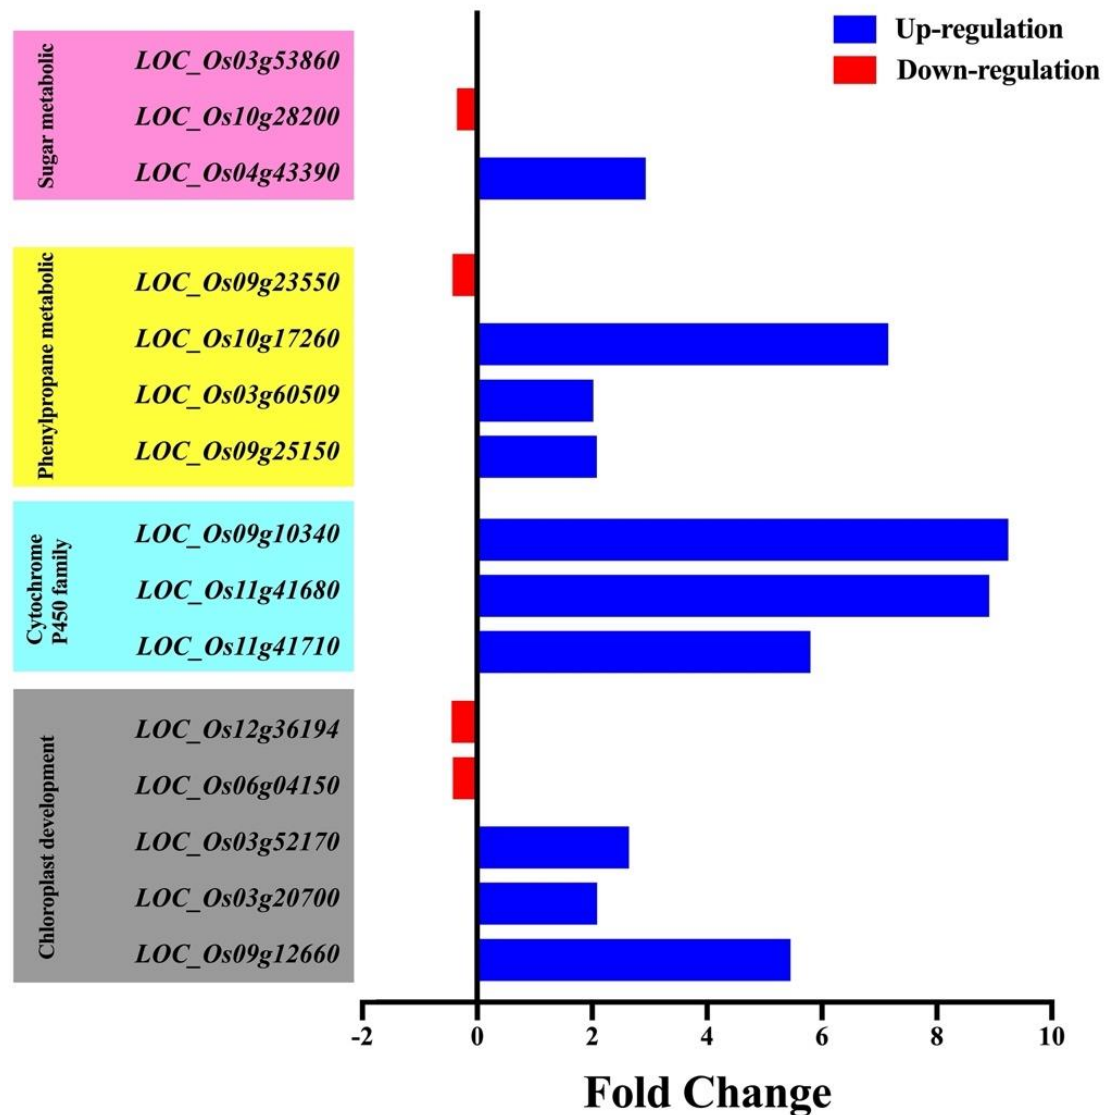

**Supplementary Figure S3.** Differential expression fold change of DEGs in different regulatory pathways between the Z-G and Z-Y comparison groups. In the figure, blue indicates upregulated expression in Z-G compared to Z-Y; red indicates downregulated expression. Z-G, zebra-green striped in leaves/alternate green leaves; Z-Y, zebra-yellow striped in leaves/alternate yellow leaves.

**Supplementary Table S1.** KEGG analysis of the differentially expressed genes in the leaves of B03S based on transcriptome sequencing.

| KEGG    | Pathway                                      | Gene ID        | Description                                        | Regulation | Fold change | P-value   |
|---------|----------------------------------------------|----------------|----------------------------------------------------|------------|-------------|-----------|
| ko00195 | Photosynthesis                               | LOC_Os04g16872 | \                                                  | Up         | 2.54        | 3.50E-10  |
|         |                                              | LOC_Os10g21212 | \                                                  | Up         | 2.15        | 1.72E-03  |
|         |                                              | LOC_Os04g16874 | \                                                  | Up         | 2.13        | 3.54E-04  |
|         |                                              | LOC_Os10g21192 | \                                                  | Up         | 3.37        | 1.10E-121 |
|         |                                              | LOC_Os10g39880 | Photosystem Q                                      | Up         | 3.43        | 2.76E-31  |
|         |                                              | LOC_Os04g16770 | \                                                  | Up         | 3.52        | 5.74E-98  |
|         |                                              | LOC_Os08g35420 | \                                                  | Up         | 3.32        | 7.74E-40  |
|         |                                              | LOC_Os10g41689 | Photosystem II D2 protein                          | Up         | 3.18        | 9.87E-04  |
|         |                                              | LOC_Os10g38234 | \                                                  | Up         | 2.36        | 1.99E-03  |
|         |                                              | LOC_Os07g05480 | \                                                  | Down       | 0.47        | 2.67E-113 |
|         |                                              | LOC_Os07g38000 | \                                                  | Down       | 0.35        | 3.85E-08  |
|         |                                              | LOC_Os04g33630 | \                                                  | Down       | 0.32        | 1.96E-11  |
| ko00830 | Retinol metabolism                           | LOC_Os11g10520 | Alcohol dehydrogenase 2                            | Up         | 7.47        | 4.39E-12  |
|         |                                              | LOC_Os05g34770 | Cytochrome c                                       | Up         | 2.13        | 3.04E-09  |
|         |                                              | LOC_Os11g07930 | Short-chain dehydrogenase Tic32                    | Up         | 2.86        | 1.45E-04  |
| ko00053 | Ascorbate and aldarate metabolism            | LOC_Os07g49400 | L-ascorbate peroxidase 2                           | Up         | 2.15        | 1.43E-33  |
|         |                                              | LOC_Os12g08810 | VTC2                                               | Up         | 7.90        | 1.21E-14  |
|         |                                              | LOC_Os12g29760 | Oxidoreductase, aldo/keto reductase family protein | Down       | 0.45        | 6.97E-06  |
|         |                                              | LOC_Os10g28200 | GDP-mannose 3,5-epimerase 1                        | Down       | 0.35        | 3.24E-19  |
| ko00980 | Metabolism of xenobiotics by cytochrome P450 | LOC_Os11g10520 | Alcohol dehydrogenase 2                            | Up         | 7.47        | 4.39E-12  |
|         |                                              | LOC_Os05g34770 | Cytochrome c                                       | Up         | 2.13        | 3.04E-09  |
|         |                                              | LOC_Os04g44924 | \                                                  | Up         | 3.86        | 6.45E-08  |
|         |                                              | LOC_Os07g07320 | \                                                  | Up         | 3.50        | 6.06E-15  |

|         |                                            |                |                                                         |      |      |          |
|---------|--------------------------------------------|----------------|---------------------------------------------------------|------|------|----------|
|         |                                            | LOC_Os05g36290 | \                                                       | Up   | 2.67 | 1.87E-03 |
|         |                                            | LOC_Os10g38710 | Glutathione transferase                                 | Down | 0.27 | 2.30E-71 |
| ko00196 | Photosynthesis -<br>antenna proteins       | LOC_Os03g39610 | Chlorophyll a-b binding protein                         | Up   | 2.11 | 3.34E-44 |
|         |                                            | LOC_Os05g34770 | Cytochrome c                                            | Up   | 2.13 | 3.04E-09 |
|         |                                            | LOC_Os08g39140 | Heat shock protein 81-1                                 | Up   | 3.57 | 3.19E-10 |
|         |                                            | LOC_Os09g26810 | \                                                       | Down | 0.37 | 7.61E-43 |
| ko00860 | Porphyrin and<br>chlorophyll<br>metabolism | LOC_Os03g20700 | Magnesium-chelatase subunit ChlH                        | Up   | 2.09 | 5.08E-05 |
|         |                                            | LOC_Os04g52130 | Oxygen-dependent coproporphyrinogen-III oxidase         | Down | 0.46 | 5.01E-22 |
|         |                                            | LOC_Os06g04150 | \                                                       | Down | 0.41 | 4.04E-02 |
| ko00740 | Riboflavin metabolism                      | LOC_Os12g35580 | Riboflavin synthase, alpha subunit family protein       | Down | 0.43 | 1.24E-06 |
| ko04146 | Peroxisome                                 | LOC_Os03g38730 | Peroxisomal membrane protein                            | Up   | 2.67 | 2.40E-08 |
|         |                                            | LOC_Os09g14600 | \                                                       | Up   | 2.00 | 6.91E-04 |
|         |                                            | LOC_Os05g04170 | \                                                       | Up   | 2.87 | 9.92E-04 |
|         |                                            | LOC_Os03g22810 | Superoxide dismutase [Cu-Zn] 1                          | Up   | 2.13 | 6.20E-11 |
|         |                                            | LOC_Os12g35890 | Sarcosine oxidase                                       | Down | 0.38 | 7.27E-05 |
| ko01110 | Biosynthesis of<br>secondary metabolites   | LOC_Os12g43130 | Phytoene synthase 2                                     | Up   | 2.97 | 4.38E-05 |
|         |                                            | LOC_Os11g10520 | Alcohol dehydrogenase 2                                 | Up   | 7.47 | 4.39E-12 |
|         |                                            | LOC_Os09g12660 | Glucose-1-phosphate adenylyltransferase small subunit 1 | Up   | 5.46 | 1.58E-03 |
|         |                                            | LOC_Os09g15820 | \                                                       | Up   | 2.06 | 3.76E-12 |
|         |                                            | LOC_Os03g63330 | Aspartokinase                                           | Up   | 2.24 | 9.46E-04 |
|         |                                            | LOC_Os04g37619 | Zeaxanthin epoxidase                                    | Up   | 5.68 | 1.97E-40 |
|         |                                            | LOC_Os08g33720 | \                                                       | Up   | 2.60 | 1.67E-07 |
|         |                                            | LOC_Os03g60509 | Chalcone--flavanone isomerase                           | Up   | 2.02 | 5.04E-09 |
|         |                                            | LOC_Os08g39840 | Lipoxygenase 7                                          | Up   | 4.22 | 7.25E-08 |
|         |                                            | LOC_Os03g20700 | Magnesium-chelatase subunit ChlH                        | Up   | 2.09 | 5.08E-05 |
|         |                                            | LOC_Os11g41710 | Cytochrome P450 family protein                          | Up   | 5.80 | 1.54E-05 |

|                |                                                                            |      |       |          |
|----------------|----------------------------------------------------------------------------|------|-------|----------|
| LOC_Os03g61130 | Phosphoesterase family protein                                             | Up   | 2.24  | 2.38E-10 |
| LOC_Os04g40950 | Glyceraldehyde-3-phosphate dehydrogenase 2                                 | Up   | 2.34  | 3.90E-13 |
| LOC_Os11g41680 | Cytochrome P450 family protein                                             | Up   | 8.91  | 2.17E-09 |
| LOC_Os11g32650 | Chalcone synthase 1                                                        | Up   | 17.16 | 2.89E-10 |
| LOC_Os05g50550 | Solaneyl-diphosphate synthase 2                                            | Up   | 4.11  | 2.25E-06 |
| LOC_Os09g10340 | \                                                                          | Up   | 9.24  | 1.34E-03 |
| LOC_Os12g42884 | 5-methyltetrahydropteroyltriglutamate--homocysteine<br>methyltransferase 2 | Up   | 2.29  | 1.92E-07 |
| LOC_Os09g25150 | \                                                                          | Up   | 2.08  | 6.50E-05 |
| LOC_Os03g51080 | Glutamate decarboxylase                                                    | Up   | 3.00  | 6.56E-05 |
| LOC_Os03g52170 | 4-hydroxy-3-methylbut-2-enyl diphosphate reductase                         | Up   | 2.64  | 5.22E-10 |
| LOC_Os07g48050 | \                                                                          | Up   | 2.88  | 1.12E-06 |
| LOC_Os12g08810 | VTC2                                                                       | Up   | 7.90  | 1.21E-14 |
| LOC_Os11g42510 | Tyrosine/nicotianamine aminotransferases family protein                    | Up   | 3.45  | 1.11E-03 |
| LOC_Os10g29470 | Probable cinnamyl alcohol dehydrogenase 3                                  | Up   | 2.25  | 7.89E-04 |
| LOC_Os04g43390 | Beta-glucosidase 16                                                        | Up   | 2.93  | 1.15E-03 |
| LOC_Os10g17260 | Flavonoid 3'-monooxygenase CYP75B3                                         | Up   | 7.15  | 1.62E-04 |
| LOC_Os06g10280 | \                                                                          | Up   | 4.90  | 3.38E-04 |
| LOC_Os04g52130 | Oxygen-dependent coproporphyrinogen-III oxidase                            | Down | 0.46  | 5.01E-22 |
| LOC_Os12g08260 | 2-oxoisovalerate dehydrogenase alpha subunit,<br>mitochondrial             | Down | 0.49  | 3.31E-04 |
| LOC_Os07g15190 | \                                                                          | Down | 0.39  | 1.99E-03 |
| LOC_Os03g53860 | Glycosyl hydrolase family 3 N terminal domain containing<br>protein        | Down | 0.05  | 3.42E-14 |
| LOC_Os06g04150 | \                                                                          | Down | 0.42  | 3.35E-30 |
| LOC_Os12g29760 | Oxidoreductase, aldo/keto reductase family protein                         | Down | 0.45  | 6.97E-06 |

|         |                         |                |                                            |      |      |          |
|---------|-------------------------|----------------|--------------------------------------------|------|------|----------|
|         |                         | LOC_Os03g45230 | \                                          | Down | 0.09 | 3.59E-06 |
|         |                         | LOC_Os07g40690 | \                                          | Down | 0.18 | 2.47E-12 |
|         |                         | LOC_Os12g35580 | Riboflavin synthase                        | Down | 0.43 | 1.24E-06 |
|         |                         | LOC_Os05g48200 | Glutamate synthase 2                       | Down | 0.33 | 2.52E-05 |
|         |                         | LOC_Os10g28200 | GDP-mannose 3,5-epimerase 1                | Down | 0.35 | 3.24E-19 |
|         |                         | LOC_Os09g23550 | Probable cinnamyl alcohol dehydrogenase 8C | Down | 0.43 | 4.34E-14 |
|         |                         | LOC_Os10g02480 | NADH-dependent oxidoreductase 2            | Down | 0.47 | 5.72E-07 |
|         |                         | LOC_Os04g42870 | \                                          | Down | 0.46 | 6.98E-04 |
|         |                         | LOC_Os12g36194 | Nucleoside diphosphate kinase              | Down | 0.45 | 8.32E-09 |
| ko00061 | Fatty acid biosynthesis | LOC_Os05g04170 | \                                          | Up   | 2.87 | 9.92E-04 |
|         |                         | LOC_Os07g37420 | \                                          | Up   | 2.67 | 5.29E-09 |
|         |                         | LOC_Os04g36800 | \                                          | Down | 0.41 | 1.49E-08 |
| ko04530 | Tight junction          | LOC_Os05g36290 | \                                          | Up   | 2.67 | 1.87E-03 |
|         |                         | LOC_Os04g43710 | \                                          | Down | 0.28 | 1.76E-09 |
| ko00906 | Carotenoid biosynthesis | LOC_Os12g43130 | Phytoene synthase 2                        | Up   | 2.97 | 4.38E-05 |
|         |                         | LOC_Os04g37619 | Zeaxanthin epoxidase                       | Up   | 5.68 | 1.97E-40 |

KEGG, Kyoto encyclopedia of genes and genomes (KEGG); Fold change, ratio of fragments per kilobase per million calculated based on transcriptome data between zebra-green striped in leaves and zebra-yellow striped in leaves.
